# Supplementary material for: MimoSA: a system for minimotif annotation
Source: Springer Nature journal article supplement (doi:10.1186/1471-2105-11-328), 2010-06-16
Supplement: 12859_2010_3785_MOESM3_ESM.pdf [file 12859_2010_3785_MOESM3_ESM.pdf]

**A**

| M  | motifType | peptideOr | motif Sequ | residue | moleculeMo   | moleculeMo | mmod | aclass       | asubClass     | go            | amod | moleculeTa | moleculeTarg | moleculeTarg | multi_subc | affinity    | pdbid            | maPubs   | maAttrs                                            | reviewer                                           |             |
|----|-----------|-----------|------------|---------|--------------|------------|------|--------------|---------------|---------------|------|------------|--------------|--------------|------------|-------------|------------------|----------|----------------------------------------------------|----------------------------------------------------|-------------|
| 1  | Lexicon   | protein   | PPPL       | 161     | IVR          | NP_057851  | 0    | binds        | general       |               |      | APGEC3G    | NP_001635    |              | none       | unknown     |                  |          | Required Modification none. Technique comm.        | cpura, ip-e                                        |             |
| 2  | Lexicon   | peptide   | SKSKDKYK   | 188     | Traf1D       | NP_005278  | 0    | modifies     | methylated    | -1-Lysine is  | Se49 | NP_085151  | SET          | none         | 34.0       | 2F69        | 16415881         |          | Required Modification none. Technique x-ray        | cpura, ip-e                                        |             |
| 3  | Consensus | unknown   | IKRQASTKQ  | unknown | unknown      | unknown    | 0    | modifies     | methylated    | -1-Lysine is  | Se49 | NP_085151  | SET          | none         |            | 2F69        | 16415881         |          | Technique sequence based prediction. MI0101        | cpura, ip-e                                        |             |
| 4  | Lexicon   | peptide   | LKSKKG     | 369     | p53          | BAC16799   | 0    | modifies     | methylated    | -1-Lysine is  | Se49 | NP_085151  | SET          | none         | 17.0       | 1XG4        | 15525038         |          | Technique nuclear magnetic resonance. MI007        | cpura, ip-e                                        |             |
| 5  | Lexicon   | peptide   | ARTKQTAR   | 2       | Histone H3   | NP_003404  | 0    | modifies     | methylated    | -1-Lysine is  | Se49 | NP_085151  | SET          | none         | 38.0       | 1MUJF, 1MT6 | 15240805         |          | Technique assay. Technique Docking. MI0035         | cpura, ip-e                                        |             |
| 6  | Lexicon   | protein   | SKSKDKA    | 2       | TAF7         | NP_005633  | 0    | modifies     | methylated    | -1-Lysine is  | Se49 | NP_085151  | SET          | none         |            | 2F69        | 16415881         |          | Required Modification none. Technique Docking      | cpura, ip-e                                        |             |
| 7  | Lexicon   | peptide   | ARTKQT     | 2       | Histone H3   | NP_003404  | 0    | binds        | methyl-lysine |               |      | NLRIF      | NP_872679    | PHD finger   | none       |             | 2F69, 2F5U, 2F5U | 16729978 |                                                    | Activity Modification none. Technique nuclear m.   | cpura, ip-e |
| 8  | Lexicon   | peptide   | ARTKQTAR   | 2       | Histone H3   | AAA37812   | 0    | -1-Lysine m. | binds         | methyl-lysine |      | ING2       | NP_075992    | PHD finger   | none       | 1.5         | 2GQ0, 2JMU       | 16728977 |                                                    | Activity Modification none. Technique Docking      | cpura, ip-e |
| 9  | Lexicon   | peptide   | ARTKQTAR   | 2       | Histone H3   | AAA37812   | 0    | -1-Lysine m. | binds         | methyl-lysine |      | ING1       | NP_036049    | PHD finger   | none       | 3.3         | 2GQ0, 2JMU       | 16728977 |                                                    | Technique x-ray crystallography. MI0114. Activity  | cpura, ip-e |
| 10 | Lexicon   | peptide   | ARTKQTAR   | 2       | Histone H3   | AAA37812   | 0    | -1-Lysine m. | binds         | methyl-lysine |      | ING3       | NP_076116    | PHD finger   | none       | 6.9         | 2GQ0, 2JMU       | 16728977 |                                                    | Technique x-ray crystallography. MI0114. Activity  | cpura, ip-e |
| 11 | Lexicon   | peptide   | ARTKQTAR   | 2       | Histone H3   | AAA37812   | 0    | -1-Lysine m. | binds         | methyl-lysine |      | ING4       | NP_579923    | PHD finger   | none       | 7.9         | 2GQ0, 2JMU       | 16728977 |                                                    | Technique x-ray crystallography. MI0114. Activity  | cpura, ip-e |
| 12 | Lexicon   | peptide   | ARTKQTAR   | 2       | Histone H3   | AAA37812   | 0    | -1-Lysine m. | binds         | methyl-lysine |      | ING5       | NP_079730    | PHD finger   | none       | 2.4         | 2GQ0, 2JMU       | 16728977 |                                                    | Activity Modification none. Technique x-ray cryst. | cpura, ip-e |
| 13 | Lexicon   | peptide   | ARTKQTAR   | 2       | Histone H3   | AAA37812   | 0    | -1-Lysine m. | binds         | methyl-lysine |      | YH01       | NP_014707    | PHD finger   | none       | 2.3         | 2GQ0, 2JMU       | 16728977 |                                                    | Technique x-ray crystallography. MI0114. Activity  | cpura, ip-e |
| 14 | Lexicon   | peptide   | ARTKQTAR   | 2       | Histone H3   | AAA37812   | 0    | -1-Lysine m. | binds         | methyl-lysine |      | YH02       | NP_011958    | PHD finger   | none       | 5.1         | 2GQ0, 2JMU       | 16728977 |                                                    | Technique x-ray crystallography. MI0114. Activity  | cpura, ip-e |
| 15 | Lexicon   | peptide   | ARTKQTAR   | 2       | Histone H3   | AAA37812   | 0    | -1-Lysine m. | binds         | methyl-lysine |      | PHK023     | NP_014302    | PHD finger   | none       | 4.5         | 2GQ0, 2JMU       | 16728977 |                                                    | Activity Modification none. Technique x-ray cryst. | cpura, ip-e |
| 16 | Lexicon   | peptide   | SYGRKRR    | 46      | Tat          | NP_057853  | 0    | binds        | acetylated    | -1-Lysine is  | PCAF | Q52831     | Bromodomain  | none         | 1.6        | 1J44        | 15724876         |          | Required Modification none. Technique assay.       | cpura, ip-e                                        |             |
| 17 | Lexicon   | peptide   | STSRHQL    | 376     | p53          | BAC16799   | 0    | binds        | acetylated    | -1-Lysine is  | CBP  | Q52793     | Bromodomain  | none         |            | 1J5P        | 16428974         |          | Technique assay. Technique Docking. MI0035         | cpura, ip-e                                        |             |
| 18 | Lexicon   | peptide   | RKASSP     | 376     | Tyrosine ty. | NP_033403  | 1    | -1-second    | binds         | general       |      | 14-3-3     | Unknown      | 14-3-3       | 1          | unknown     | 8601312          |          | Technique Docking. MI0035. Activity Modification   | cpura, ip-e                                        |             |
| 19 | Lexicon   | peptide   | RSASEP     | 618     | Raf1         | NP_044956  | 1    | -1-second    | binds         | general       |      | 14-3-3     | Unknown      | 14-3-3       | 1          | 3CUB        | 8601312          |          | Technique x-ray crystallography. MI0114. Techn.    | cpura, ip-e                                        |             |
| 20 | Lexicon   | peptide   | RSASEP     | 763     | Raf1         | NP_047455  | 1    | -1-second    | binds         | general       |      | 14-3-3     | Unknown      | 14-3-3       | 1          | unknown     | 8601312          |          | Activity Modification none. Technique x-ray cryst. | cpura, ip-e                                        |             |

**B**

**Motif Data** | Modifications | Attributes

id: 18

motifType: Lexicon

peptideOrProtein: Peptide

motifSequence: RHASSP

residuePosition: 316

moleculeMotifName: Tyrosine hydroxylase

moleculeMotifDbid: NP\_033403

aclass: binds

asubClass: general

go:

moleculeTargetName: 14-3-3

moleculeTargetDbid: Unknown

moleculeTargetDomain: 14-3-3

multiDomain: 1

subcellularDomain:

affinity: null

maPubs: 8601312

pdbid: unknown

SaveAction | Clone Motif | Check Sequence

**C**

**Motif Data** | Modifications | Attributes

Modification Name:

Database ID:

Residue: R 316

Type: NULL

Add Modification

Modifications:

-1:second Ser must be phosphorylated:O-phospho-L-serine

Delete Modification

**D**

**Motif Data** | Modifications | Attributes

Attributes:

Technique = Docking\_MI0035

Activity Modification = none

Technique = assay

Technique = Peptide mapping
