# Supplementary material for: MimoSA: a system for minimotif annotation
Source: Springer Nature journal article supplement (doi:10.1186/1471-2105-11-328), 2010-06-16
Supplement: 12859_2010_3785_MOESM5_ESM.pdf [file 12859_2010_3785_MOESM5_ESM.pdf]

A

Mimosa

File

Motif Browser Paper Browser

| pmid     | author                                 | affiliation                     | journal                             | date | co | trackingStatus       | score   | title                                                            | url                       | description                                             | t | id |
|----------|----------------------------------------|---------------------------------|-------------------------------------|------|----|----------------------|---------|------------------------------------------------------------------|---------------------------|---------------------------------------------------------|---|----|
| 12647309 | Myers Martins Ostrowski Stachowiak     | Molecular and Structural Neur.  | Journal of cellular biochemistry    |      |    | Reviewed - No Motifs | 3.22525 | Nuclear trafficking of FGFR1: a role for the transmembrane d.    | http://www.ncbi.nlm.nih.g | Several members of the fibroblast growth factor         |   |    |
| 12480936 | Yang Gao Li Lu Fan Palef Pomerant      | The Dorrance H. Hamilton La.    | The Journal of biological chemistry | 2002 |    | Not Reviewed         | 3.05585 | Potent suppression of viral infectivity by the peptides that inh | http://www.ncbi.nlm.nih.g | Viral infectivity factor (VIF) is essential for the re. |   |    |
| 12692907 | Adams Hasson Boyer-Boileau El-Khis     | Department of Biologi/Biotec.   | Journal of neuroscience research    |      |    | Not Reviewed         | 2.98102 | A peptide fragment of ependymin neurotrophic factor uses pr      | http://www.ncbi.nlm.nih.g | Ependymin (EPM) is a goldfish brain neurotrop.          |   |    |
| 12234182 | Stainers Muff Gujer Fischer Bom        | Research Laboratory for Calc    | Biochemistry                        |      |    | Not Reviewed         | 2.9542  | The transmembrane domain of receptor-activy-modifying pr         | http://www.ncbi.nlm.nih.g | Three receptor-activy-modifying proteins (RAM           |   |    |
| 12698188 | Konishi Tsujikawa Yamamoto Ishida      | Department of Pathology, Nar    | British journal of cancer           |      |    | Not Reviewed         | 2.93176 | Overexpression of leucocyte common antigen (LAR) P-subun         | http://www.ncbi.nlm.nih.g | Protein tyrosine phosphatase (PTPase) depho.            |   |    |
| 12509107 | Petersen Hilpert Miltz Zandler Jacobs  | Max-Deibruock-Center for Mol.   | Journal of cell science             |      |    | Not Reviewed         | 2.92578 | Functional interaction of megalin with the megalinbinding pro    | http://www.ncbi.nlm.nih.g | Megalin is a member of the LDL receptor gene            |   |    |
| 12900394 | Pomilos Higginson Stray Fisher Garu    | Department of Biochemistry      | The Journal of cell biology         |      |    | Not Reviewed         | 2.91545 | HIV Gag mimics the Tsg101-recruiting activity of the human       | http://www.ncbi.nlm.nih.g | The HIV-1 Gag protein recruits the cellular facto.      |   |    |
| 12429019 | Meinhardt Cheng Kwon Donohue Ras       | Department of Biochemistry      | Plant physiology                    |      |    | Not Reviewed         | 2.87121 | Role of the arginyl-glycol-aspartic motif in the action of Pp    | http://www.ncbi.nlm.nih.g | A fundamental problem of plant science is to u.         |   |    |
| 12480930 | Cheng Hirschi                          | United States Department of     | The Journal of biological chemistry | 2002 |    | Not Reviewed         | 2.86573 | Cloning and characterization of CXP1, a novel PICOT domai        | http://www.ncbi.nlm.nih.g | Regulation of Ca(2+) transporters is a vital com        |   |    |
| 12147211 | Miyachi Tadotsu Hayashi Ono Tokoyo     | Department of Immunology        | Neuropeptides                       |      |    | Not Reviewed         | 2.85052 | Molecular cloning and characterization of mouse calcitonin g     | http://www.ncbi.nlm.nih.g | The calcitonin gene-related peptide (CGRP) pla          |   |    |
| 12913006 | Jung Tan Landman Petrova Murray Le     | Department of Pathology, Tau    | The Journal of biological chemistry | 2003 |    | Not Reviewed         | 2.75447 | Regulated intramembrane proteolysis of the p75 neurotroph        | http://www.ncbi.nlm.nih.g | The generation of biologically active proteins by       |   |    |
| 12690097 | Hutchings Clarkson Chalkley Barclay    | Sir William Dunn School of P    | The Journal of biological chemistry | 2003 |    | Not Reviewed         | 2.74591 | Linking the T cell surface protein CD2 to the actin-capping pr   | http://www.ncbi.nlm.nih.g | Recruitment of CD2 to the immunological syna.           |   |    |
| 12450278 | Sadler Eom Yang Dimitrova Tam          | Department of Microbiology a    | Biochemistry                        |      |    | Not Reviewed         | 2.74299 | Translocating proline-rich peptides from the antimicrobial pe    | http://www.ncbi.nlm.nih.g | The intracellular delivery of most peptides, prot.      |   |    |
| 12763936 | Licht Tsinulnikov Reuveni Yamitzky Ben | Keryx Biopharmaceuticals, Je    | Blood                               | 2003 |    | Not Reviewed         | 2.73885 | Induction of pro-angiogenic signaling by a synthetic peptide d   | http://www.ncbi.nlm.nih.g | The G-protein-coupled receptors of the endothe          |   |    |
| 12480181 | Knight Papagerakis Simmons Bardal      | University of Texas Health Sci. | Connective tissue research          |      |    | Not Reviewed         | 2.7289  | Genomic organization and localization of mouse NmaGAMBL          | http://www.ncbi.nlm.nih.g | Our laboratory has determined the DNA sequ.             |   |    |
| 14522951 | Kirshner Schumann Shively              | Graduate School of the City of  | The Journal of biological chemistry | 2003 |    | Not Reviewed         | 2.70108 | CEACAM1, a cell-cell adhesion molecule, directly associates      | http://www.ncbi.nlm.nih.g | The epithelial cell adhesion molecule CEACAM            |   |    |
| 12435749 | Sun Saitar Sachchidanand Xu Zeng Z     | Department of Pediatrics and    | The Journal of biological chemistry | 2002 |    | Not Reviewed         | 2.70058 | A 14-amino acid sequence with a beta-turn structure is requir    | http://www.ncbi.nlm.nih.g | The rat ileal sodium-dependent bile acid transp.        |   |    |
| 12213567 | Pouyssegur Volmat Lenormand            | Institute of Signaling, Develop | Biochemical pharmacology            |      |    | Not Reviewed         | 2.68532 | Fidelity and spatio-temporal control in MAP kinase (ERKs) si     | http://www.ncbi.nlm.nih.g | Extracellular signals transduced via receptor ty        |   |    |

Tag Policy: Reload if Empty [Add Paper]

Sort By: pmid [Launch by pmid]

Reload

B

Tracking Status Not Reviewed

Annotate
